# Supplementary material for: Combined RNAseq and ChIPseq Analyses of the BvgA Virulence Regulator of Bordetella pertussis
Source: PubMed Central journal article supplement (PMC7253368; doi:10.1128/msystems.00208-20), 2020-05-19

Figure S5

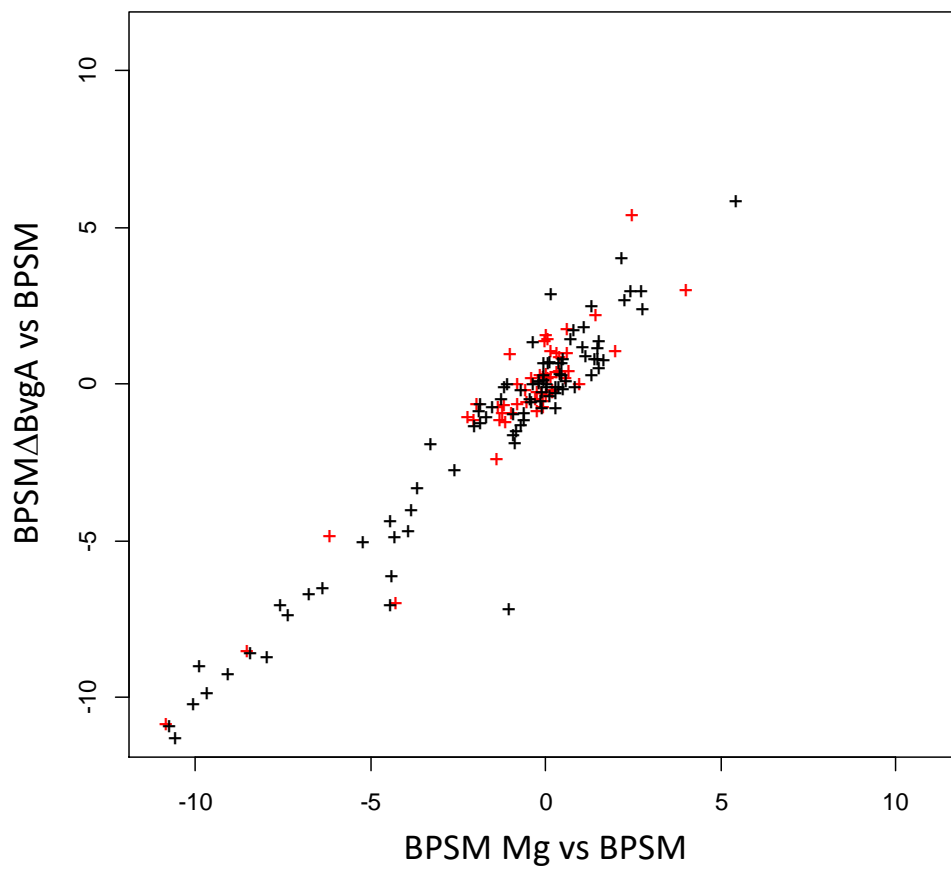

Supplement: mSystems.00208-20-sf005.pdf [file mSystems.00208-20-sf005.pdf]
