# Supplementary material for: Combined RNAseq and ChIPseq Analyses of the BvgA Virulence Regulator of Bordetella pertussis
Source: PubMed Central journal article supplement (PMC7253368; doi:10.1128/msystems.00208-20), 2020-05-19

A

*fim2**maeB*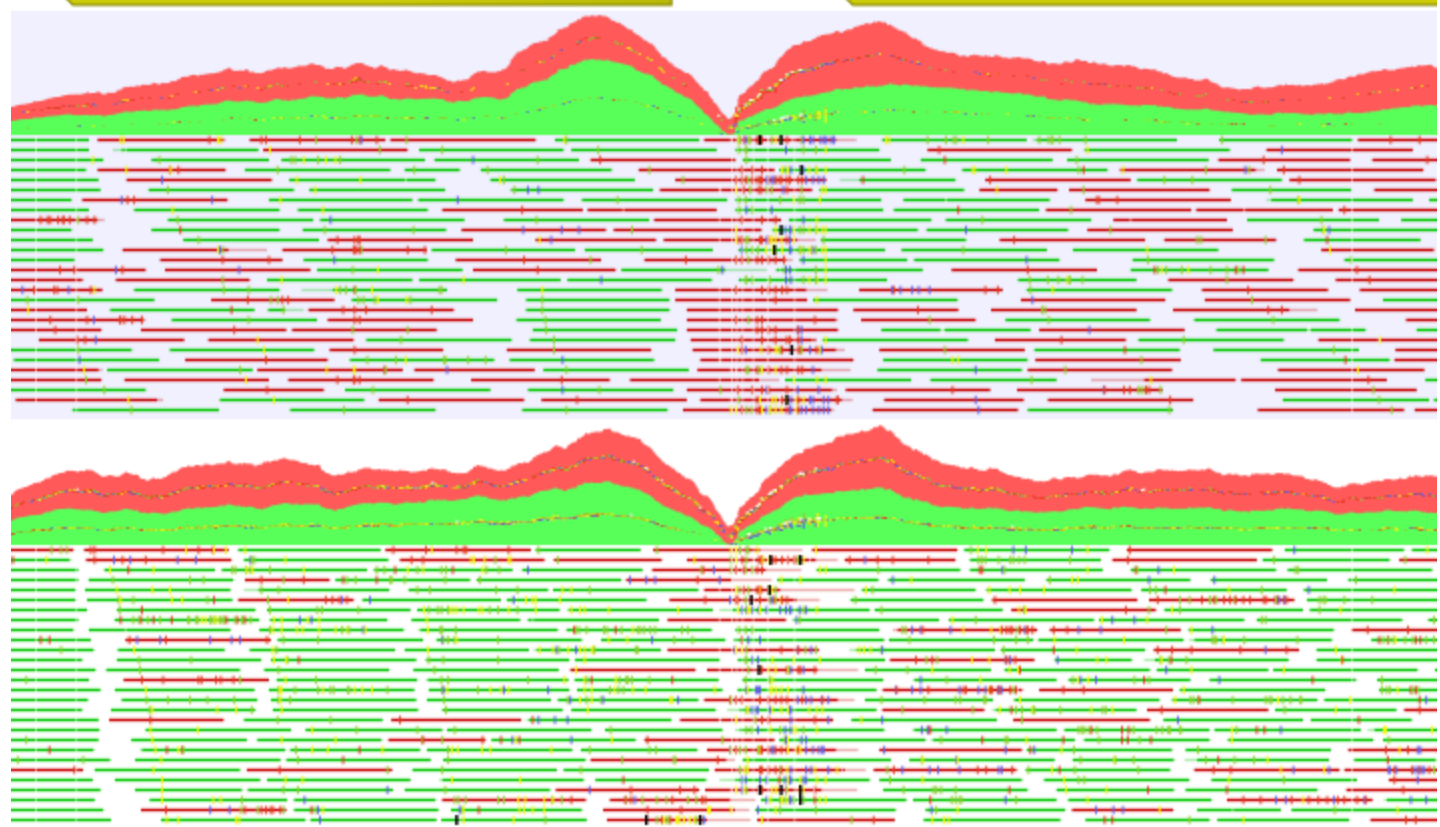

B

*bp1567**fim3**bp1569*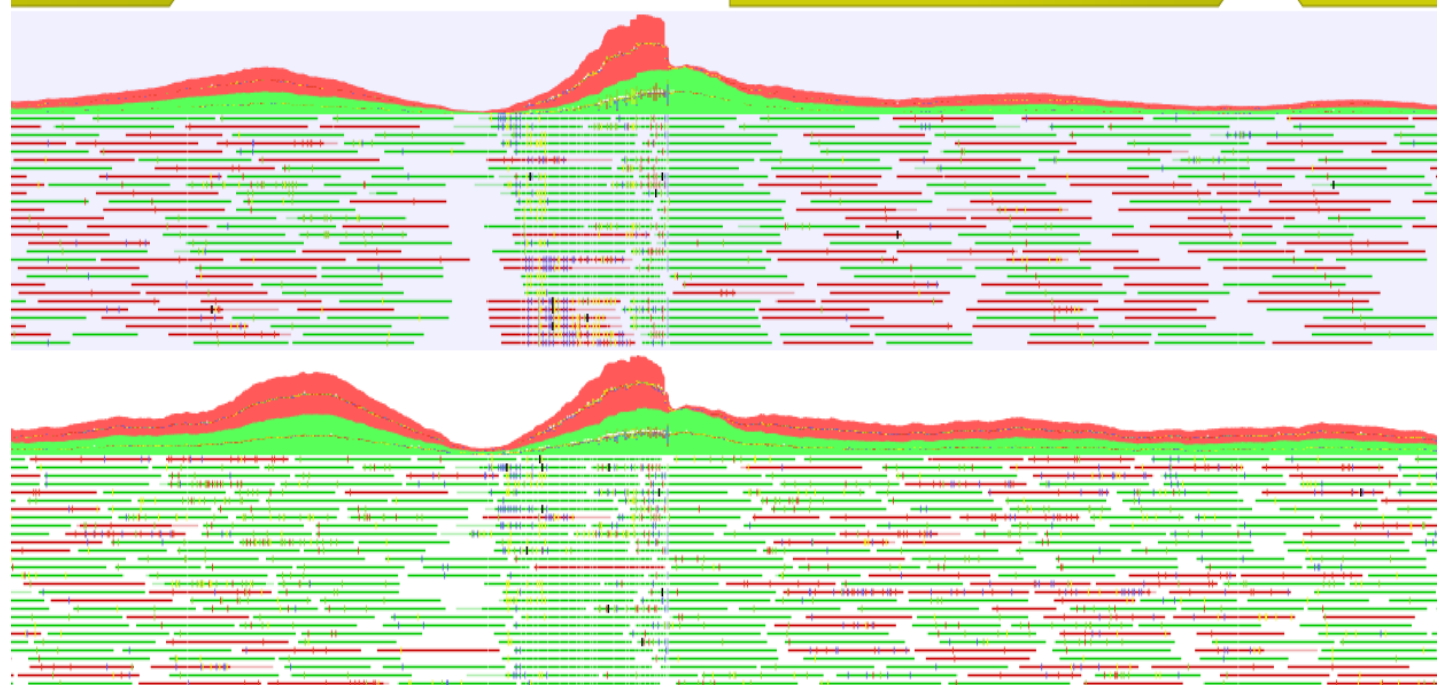

Supplement: mSystems.00208-20-sf006.pdf [file mSystems.00208-20-sf006.pdf]
