# Supplementary material for: Combined RNAseq and ChIPseq Analyses of the BvgA Virulence Regulator of Bordetella pertussis
Source: PubMed Central journal article supplement (PMC7253368; doi:10.1128/msystems.00208-20), 2020-05-19

| gene          | Product                                          | Synonym     | BPSM Mg<br>vs BPSM | BPSM $\Delta$ BvgA<br>vs BPSM |
|---------------|--------------------------------------------------|-------------|--------------------|-------------------------------|
| <i>bp0022</i> | Two-component response regulator                 |             | -0.47              | -0.26                         |
| <i>bp0142</i> | GntR family transcriptional regulator            |             | -1.51              | -1.15                         |
| <i>bp0764</i> | probable LysR-family transcriptional regulator   | <i>cyaX</i> | -4.17              | -4.17                         |
| <i>bp1021</i> | RNA polymerase sigma factor for flagellar operon | <i>flaD</i> | 0.00               | 0.00                          |
| <i>bp1417</i> | [protein-PII] uridylyltransferase                | <i>glnD</i> | -0.28              | -1.06                         |
| <i>bp1496</i> | probable two-component response regulator        |             | -4.48              | -4.26                         |
| <i>bp1876</i> | regulatory protein BvgR                          | <i>bvgR</i> | -6.38              | -6.39                         |
| <i>bp1877</i> | virulence sensor protein                         | <i>bvgS</i> | -2.02              | -1.78                         |
| <i>bp1878</i> | virulence factors transcription regulator        | <i>bvgA</i> | -2.29              | -3.39                         |
| <i>bp2234</i> | putative RNA polymerase sigma factor             | <i>brpL</i> | -8.00              | -8.59                         |
| <i>bp2268</i> | methyl-accepting chemotaxis protein              |             | 0.00               | 0.00                          |
| <i>bp2399</i> | putative transcriptional regulator               |             | -0.14              | -0.64                         |
| <i>bp2507</i> | ferric ion uptake regulator                      | <i>fur</i>  | 0.14               | 1.51                          |
| <i>bp2520</i> | putative LysR-family regulatory protein          |             | -0.19              | 1.14                          |
| <i>bp3350</i> | two component response regulator                 |             | 0.41               | -0.20                         |

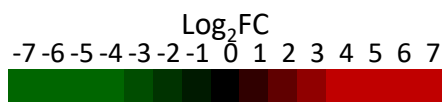

Supplement: mSystems.00208-20-sf007.pdf [file mSystems.00208-20-sf007.pdf]
